# Supplementary material
Source: PubMed Central journal article supplement (PMC6346425)

**A** Inducible D<sup>b</sup> Expression  
with IFN $\gamma$

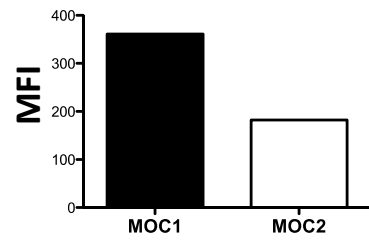

Supplement: NIHMS1005219-supplement-1.pdf [file NIHMS1005219-supplement-1.pdf]
